# Supplementary material
Source: PubMed Central journal article supplement (PMC11577286)
Supplement: NIHMS2033609-supplement-SupplementaryMaterial.pdf [file NIHMS2033609-supplement-SupplementaryMaterial.pdf]

## Supplemental Materials

**Supplemental Table 1. Antidepressants reverse the effects of stress on structural and functional properties of neurons in multiple brain regions.** A selection of studies assessing antidepressant effects on structural (green) and functional (blue) endpoints in stress and depression models. CA3, cornu Ammonis subfield 3; DG, dentate gyrus; mPFC, medial prefrontal cortex; PL, prelimbic cortex; Cg, cingulate cortex; NAc, nucleus accumbens; D1, dopamine receptor 1; LHb, lateral habenula; vHb, ventral habenula (homolog of LHb); CRS, chronic restraint stress; CORT, chronic corticosterone administration; CMS, chronic mild stress; UMS, unpredictable mild stress; CUS, chronic unpredictable stress; cLH, congenital learned helplessness; TBG, tabernanthalog

| Study                | Stressor | Brain region     | Antidepressant | Endpoint            | Effect direction |                |
|----------------------|----------|------------------|----------------|---------------------|------------------|----------------|
|                      |          |                  |                |                     | Stress           | Antidepressant |
| Watanabe et al. 1992 | CORT     | Hippocampus, CA3 | Tianeptine     | Dendrite length     | ↓                | ↑              |
|                      |          |                  |                | Dendrite complexity | ↓                | ↑              |
|                      | CRS      |                  |                | Dendrite length     | ↓                | ↑              |
|                      |          |                  |                | Dendrite complexity | ↓                | ↑              |
| Bessa et al. 2009    | CMS      | Hippocampus, CA3 | Fluoxetine     | Dendrite length     | ↓                | ↑              |
|                      |          |                  |                | Spine density       | ↓                | ↑              |
|                      |          |                  | Imipramine     | Dendrite length     | ↓                | ↑              |
|                      |          |                  |                | Spine density       | ↓                | ↑              |
|                      |          | Hippocampus, DG  | Fluoxetine     | Dendrite length     | ↓                | ↑              |
|                      |          |                  |                | Spine density       | ↔                | ↔              |
|                      |          |                  | Imipramine     | Dendrite length     | ↓                | ↑              |
|                      |          |                  |                | Spine density       | ↔                | ↔              |

|                                         |            |               |            |                             |   |   |
|-----------------------------------------|------------|---------------|------------|-----------------------------|---|---|
|                                         |            | PL            | Fluoxetine | Dendrite length             | ↓ | ↑ |
|                                         |            |               | Imipramine | Spine density               | ↓ | ↑ |
|                                         |            |               |            | Dendrite length             | ↓ | ↑ |
|                                         |            |               |            |                             |   |   |
| Spine formation                         | ↓          | ↑             |            |                             |   |   |
| Moda-Sava, Murdock, Parekh, et al. 2019 | CORT       | mPFC          | Ketamine   | Multicell. ensembles (Ca2+) | ↓ | ↑ |
| Li et al. 2011                          | CUS        | Cg/PL         | Ketamine   | Spine density               | ↓ | ↑ |
|                                         |            |               |            | Spine diameter              | ↓ | ↑ |
|                                         |            |               |            | Spine length                | ↑ | ↓ |
|                                         |            |               |            | Synaptic proteins           | ↓ | ↑ |
|                                         |            |               |            | 5-HT/Hypocretin EPSCs       | ↓ | ↑ |
| Lu et al. 2021                          | UMS        | Barrel cortex | TBG        | Synch. Firing (Ca2+)        | ↑ | ↓ |
|                                         |            |               |            | PV neuron excitability      | ↓ | ↑ |
| Berton et al. 2006                      | CSDS       | NAc           | Fluoxetine | BDNF signaling genes        | ↑ | ↓ |
| LeGates et al. 2018                     | CMS        | NAc D1 MSN    | Fluoxetine | AMPA/NMDA ratio             | ↓ | ↑ |
| Andalman et al. 2019                    | Shock      | vHb (LHb)     | Ketamine   | Ca2+ activity               | ↑ | ↓ |
| Yang et al. 2018                        | cLH strain | LHb           | Ketamine   | Bursting activity           | ↑ | ↓ |
|                                         |            |               | Fluoxetine | Bursting activity           | ↑ | ↔ |
|                                         | CRS        | LHb           | Ketamine   | Bursting activity           | ↑ | ↓ |

## Supplemental Discussion: Common Preclinical Stress Models

- **Corticosterone (CORT) administration:** CORT can be administered to animals in drinking water or through implanted pellets. Endogenous corticosterone synthesis and release varies with the circadian cycle and therefore, timed administration is ideal to modulate the naturally occurring circadian rhythm in glucocorticoid activity (Liston et al. 2013).
- **Unpredictable Chronic Mild Stress (UCMS):** The UCMS paradigm and related variants include randomized, daily exposures to various mild stressors over the course of several weeks. Stressed animals develop reward consumption deficits and despair-like behavioral profiles which can be reversed with classic antidepressants including fluoxetine (Frisbee et al. 2015, Willner 1997).
- **Chronic Social Defeat Stress (CSDS):** CSDS is an ethologically relevant paradigm that exploits the natural tendency of rodents to form social dominance hierarchies (Golden et al. 2011, Krishnan et al. 2007, Kudryavtseva et al. 1991). Repeated subordination results in elevated corticosterone, social avoidance, consummatory anhedonia and structural changes in the hippocampus of susceptible animals (Magariños et al. 1996). The basis for resilience to social stress is under active investigation (Cathomas et al. 2019, Wang et al. 2018). Importantly, efforts have been made to adapt the protocol for female rodents, as sex is a significant risk factor for depression (Harris et al. 2018, Yohn et al. 2019).
- **Learned Helplessness (LH):** Animals exposed to uncontrollable aversive events display maladaptive passive behaviors (Overmier & Seligman 1967). In this paradigm, rodents are tested for active avoidance following inescapable foot-shocks. The increased latency to escape is rescued by classic antidepressants, lending predictive validity to this model. Limitations include questions about its relevance for identifying antidepressant compounds that do not target monoamines and caveats about anthropomorphizing rodent behavior (Nestler & Hyman 2010).
- **Early Life (ELS) and 2-Hit Stress:** Early childhood and adolescence are sensitive periods for long-lasting deleterious effects of stress on brain function and the development of affective disorders (Sánchez et al. 2001). Limited bedding environment paired with maternal separation early in life may increase susceptibility to chronic stress effects on social interaction and reward-seeking behavior in adulthood (Fenoglio et al. 2006, Peña et al. 2019).

## LITERATURE CITED

- Cathomas F, Murrough JW, Nestler EJ, Han M-H, Russo SJ. 2019. Neurobiology of resilience: interface between mind and body. *Biol. Psychiatry* 86(6):410–20
- Fenoglio KA, Brunson KL, Baram TZ. 2006. Hippocampal neuroplasticity induced by early-life stress: functional and molecular aspects. *Front. Neuroendocrinol.* 27(2):180–92
- Frisbee JC, Brooks SD, Stanley SC, d’Audiffret AC. 2015. An unpredictable chronic mild stress protocol for instigating depressive symptoms, behavioral changes and negative health outcomes in rodents. *J. Vis. Exp.* 106:53109
- Golden SA, Covington HE 3rd, Berton O, Russo SJ. 2011. A standardized protocol for repeated social defeat stress in mice. *Nat. Protoc.* 6(8):1183–91
- Harris AZ, Atsak P, Bretton ZH, Holt ES, Alam R, et al. 2018. A Novel Method for Chronic Social Defeat Stress in Female Mice. *Neuropsychopharmacology* 43(6):1276–83
- Kudryavtseva NN, Bakshtanovskaya IV, Koryakina LA. 1991. Social model of depression in mice of C57BL/6J strain. *Pharmacol. Biochem. Behav.* 38(2):315–20
- Overmier JB, Seligman ME. 1967. Effects of inescapable shock upon subsequent escape and avoidance responding. *J. Comp. Physiol. Psychol.* 63(1):28–33
- Peña CJ, Nestler EJ, Bagot RC. 2019. Environmental programming of susceptibility and resilience to stress in adulthood in male mice. *Front. Behav. Neurosci.* 13:40
- Sánchez MM, Ladd CO, Plotsky PM. 2001. Early adverse experience as a developmental risk factor for later psychopathology: evidence from rodent and primate models. *Dev. Psychopathol.* 13(3):419–49
- Wang J, Hodes GE, Zhang H, Zhang S, Zhao W, et al. 2018. Epigenetic modulation of inflammation and synaptic plasticity promotes resilience against stress in mice. *Nat. Commun.* 9:477

Willner P. 1997. Validity, reliability and utility of the chronic mild stress model of depression: a 10-year review and evaluation. *Psychopharmacology* 134(4):319–29

Yohn CN, Dieterich A, Bazer AS, Maita I, Giedraitis M, Samuels BA. 2019. Chronic non-discriminatory social defeat is an effective chronic stress paradigm for both male and female mice. *Neuropsychopharmacology* 44(13):2220–29
